# Supplementary material for: Growth and characterization of large high quality brownmillerite CaFeO2.5 single crystals
Source: Royal Society of Chemistry journal article supplement (doi:10.1039/c2ce25413a), 2012-01-01
Supplement: c2ce25413a.pdf [file c2ce25413a.pdf]

## Supporting Information

### Growth and characterization of large high quality bowenmillerite $\text{CaFeO}_{2.5}$ single crystals

Monica Ceretti,<sup>1,2</sup> Andrea Piovano,<sup>3,4</sup> Alain Cousson,<sup>5</sup> Tanguy Berthier,<sup>2,3</sup> Martin Meven,<sup>6</sup> Giovanni Agostini,<sup>3</sup> Jurg Schefer,<sup>7</sup> Olivier Hernandez,<sup>2</sup> Carlo Lamberti<sup>3</sup> and Werner Paulus<sup>1,2\*</sup>

<sup>1</sup> University of Montpellier 2, UMR 5253, ICGM, C2M, CC1504, 5 Place Eugène Batallion, F-34095 Montpellier, France

<sup>2</sup> Sciences Chimiques de Rennes, UMR 6226 CNRS-Université de Rennes I, Inorganic Materials: Soft Chemistry and Reactivity of Solids, Bât. 10B, Campus de Beaulieu, F-35042 Rennes, France

<sup>3</sup> Department of Chemistry, NIS Center of Excellence, and INSTM unit, University of Turin, Via Giuria 7, I-10125 Turin, Italy

<sup>4</sup> Institut Laue-Langevin (ILL), BP 156 X, F-38042 Grenoble Cedex, France,

<sup>5</sup> LLB, CEA/Saclay 91191 Gif-sur-Yvette cedex, France

<sup>6</sup> TU-München, FRM-II, München, Germany

<sup>7</sup> Laboratory for Neutron Scattering Paul Scherrer Institut, CH-5232 Villigen PSI, Switzerland

\* To whom the correspondence should be addressed. E-mail: [werner.paulus@univ-montp2.fr](mailto:werner.paulus@univ-montp2.fr).

#### Contents

S1 : FWHM vs  $\Psi$ -scan angle (neutron diffraction) for (202) and (404) reflections

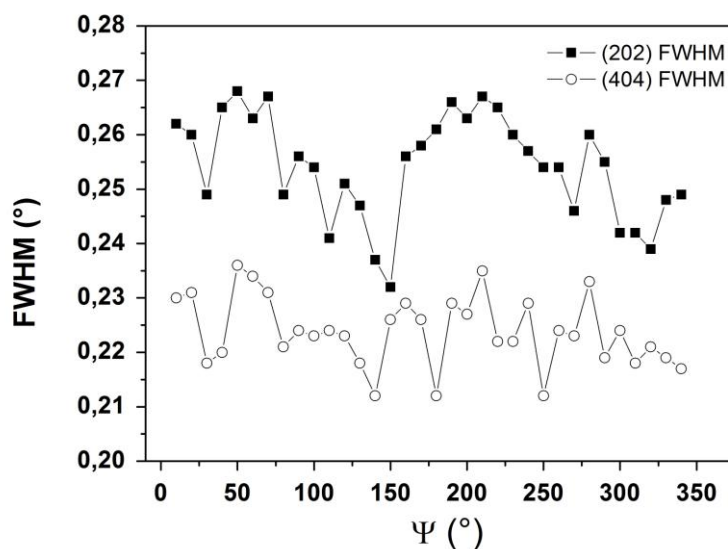

S1: FWHM vs  $\Psi$ -scan for (202) and (404) reflections
